# Supplementary material for: Predicting the salt water intrusion in the Shatt al Arab estuary using an analytical approach
Source: Copernicus journal article supplement (doi:10.5194/hess-2016-141), 2016-04-28
Supplement: Supplementary file [file hess-2016-141-RC2-supplement.pdf]

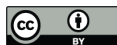

## Predicting the salt water intrusion in the Shatt al Arab estuary using an analytical approach

Ali D. Abdullah,<sup>1,2,3\*</sup> Jacqueline I. A. Gisen,<sup>4,5</sup> Pieter van der Zaag,<sup>1,2</sup> Hubert H.G. Savenije,<sup>2</sup> Usama F.A. Karim,<sup>6</sup> Ilyas Masih,<sup>1</sup> Ioana Popescu<sup>1</sup>

1. Department of Integrated Water System and Governance, UNESCO-IHE Institute for Water Education, Westvest 7, 2611 AX, Delft, the Netherlands

2. Water Resources Section, Delft University of Technology, Delft, the Netherlands

3. Department of Civil Engineering, Basra University, Basra, Iraq.

4. Centre for Earth Resources Research and Management, University Malaysia Pahang, Lebuhraya Tun Razak, Gambang, 26300 Kuantan, Pahang, Malaysia.

5. Faculty of Civil Engineering and Earth Resources, University Malaysia Pahang, Lebuhraya Tun Razak, Gambang, 26300 Kuantan, Pahang, Malaysia.

6. Department of Civil Engineering, University of Twente, P.O. Box 217, 7500 AE, Enschede, the Netherlands.

\* Correspondence to: Ali D. Abdullah ([a.abdullah@unesco-ihe.org](mailto:a.abdullah@unesco-ihe.org) and [alidinar77@gmail.com](mailto:alidinar77@gmail.com))

### Abstract

Longitudinal and vertical salinity measurements are used in this study to predict the extent of in-land seawater intrusion in a deltaic river estuary. A predictive model is constructed to apply to the specific tidal, seasonal and discharge variability and geometric characteristics of the Shatt al-Arab River (SAR) situated along the border of Iraq and Iran. Reliable hydrologic simulation of salinity dynamics and seawater intrusion was lacking prior to this study. Tidal excursion is simulated analytically using a 1-D analytical salt intrusion model with recently updated equations for tidal mixing. The model was applied under different river conditions to analyze the seasonal variability of salinity distribution during wet and dry periods near spring and neap tides between **March 2014 and January 2015**. A good fit is possible with this model between computed and observed salinity distribution. Estimating water abstractions along the estuary improves the performance of the equations, especially at low flows and with a well calibrated dispersion-excursion relationship of the updated equations. Salt intrusion lengths given the current data varied from 38 to 65 km during the year of observation. With extremely low river discharge, which is highly likely there, we predict a much further distance of 92 km. These new predictions demonstrate that the SAR, already plagued with extreme salinity, may face deteriorating water quality levels in the near future, requiring prompt interventions.

**Keywords:** Analytical model; Salt intrusion; Shatt al-Arab River; Alluvial estuaries

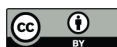

## 1 1 Introduction

2

3 Discharge of fresh river water into the ocean is closely related with vertical and longitudinal salinity variations along an estuary (e.g.  
4 Savenije et al, 2013; Whitney, 2010; Becker et al., 2010; Wong, 1995; MacKay and Schumann, 1990). River discharge also has a  
5 noticeable effect on the tidal range primarily through the friction term (the amount of energy per unit width lost by friction) (Savenije,  
6 2005). A decrease of river discharge into an estuary could increase the tidal range and the wave celerity, and consequent increase in salinity  
7 levels (Cai et al., 2012). Upstream developments of large dams and water storage facilities change the nature of river flow and subsequently  
8 alter river hydrology and quality (Vorosmarty and Sahagian, 2000; Helland-Hansen et al., 1995). The Shatt al-Arab River (SAR) which  
9 discharges through its estuary at the border between Iran and Iraq into the Gulf is facing serious reductions in freshwater inflows upstream  
10 and from its tributaries, as well as significant salt intrusion downstream (Abdullah et al., 2015). The alteration of river discharge also  
11 affects the estuarine ecosystem in terms of sediments, nutrients, dissolved oxygen, and bottom topography (Sklar and Browder, 1998). All  
12 these problems are strongly featured in the SAR.

13

14 The increases in salinity along the SAR, particularly caused by salt intrusion, have become a threat to the people and environment alike.  
15 Generally, salt water intrusion makes the river water unfit for human consumption and unacceptable for irrigation practices (Abdullah et  
16 al., submitted; Al-Tawash et al., 2013). Saline water in the SAR estuary comes from both natural (sea water intrusion) and anthropogenic  
17 sources. Thus, the pattern of the salinity variation is complex because of the dynamic spatial and temporal interaction between salinity  
18 sources. Available studies on the SAR identify the escalating pressure of salinity increment and its consequences on water users as well as  
19 the ecosystem (e.g. Abdullah et al., submitted; Al-Tawash et al., 2013; Fawzi and Mahdi, 2014), but detailed information on the extent of  
20 salt water intrusion under different conditions is lacking. Hence, there is a need to investigate the impact of seawater intrusion among other  
21 sources on the river salinity, and to analyze the dynamics of the saline-fresh water interface for effective water management.

22

23 Different approaches have been used to study the relationship between saline and fresh water in estuaries. Alber (2002) proposed a  
24 conceptual model for managing freshwater discharge into estuaries. Wang et al. (2011) used an empirical approach, conducting three  
25 hydrological surveys along six locations around the Yellow River mouth to investigate the effect of abrupt changes in the river discharge  
26 on the salinity variations. Using a numerical model, Bobba (2002) analyzed the mechanism of salt water and freshwater flow in the  
27 Godavari Delta and found that freshwater withdrawals contribute to the advance in seawater intrusion. Lui et al. (2004) applied a two-  
28 dimensional model to estimate the salinity changes in the Tanshui River, showing that the significant salinity increase is a result of  
29 reservoir construction and bathymetric changes. A 3D model was used by Vaz et al. (2009) to study the patterns of saline water in the  
30 Espinheiro tidal channel. The result indicates that the model underestimated the salinity distributions for high river inflow. Das et al. (2012)  
31 used a hydrology-hydrodynamics model to examine salinity variations under different water diversion scenarios in the Barataria estuary,  
32 and discovered that the diversions have a strong impact on salinity in the middle section of the estuary and minor impact in the upper  
33 section.

34

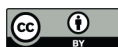

1 Analytical approaches describing salinity distribution in estuaries have been used by Ippen and Harlemen (1961), Prandle (1985) and  
2 Savenije (1986). An analytical solution is able to provide important knowledge about the relationship between tide, river flow, and  
3 geometry of the tidal channel. The one-dimensional modelling is usually based on a number of assumptions to simplify the set of equations.  
4 Several available models generally assumed a constant tidal channel cross-section to linearize and simplify the calculation processes. In  
5 this study the 1-D analytical salt intrusion model proposed by Savenije (1986, 1989, and 1993) is considered, which uses the more natural  
6 exponential geometry and requires a minimal amount of data. The model has been successfully applied to several single-channel estuaries  
7 worldwide (e.g. Risley et al., 1993; Horrevoets et al., 2004; Gisen et al., 2015a). Moreover, it can also describe the tidal propagation in  
8 multi-channel estuaries (Zhang et al, 2012) as well as estuaries with a slightly sloping bottom (Nguyen and Savenije, 2006; Cai et al.,  
9 2015).

10  
11 The aim of this study is to determine the real extent of salt intrusion into the SAR estuary. This is by applying the 1-D analytical salt  
12 intrusion model combined with the revised predictive equations for tidal mixing of Gisen et al. (2015b). Then the predictive model was  
13 used to examine the consequences of changes in river flow on the salinity distribution.  
14

## 15 2 Research area

16  
17 The SAR is located in southern Iraq and its estuary is connected to the Gulf (Fig. 1). The total length of the river is 195 km, of which the  
18 last 95 km serves as a boundary between Iraq and Iran. The estuary receives fresh water from four main tributaries. The Tigris and  
19 Euphrates rivers originate in Turkey and form the SAR at their confluence near the city of Qurna, Iraq. The other two tributaries, Karkheh  
20 and Karun, originate in Iran. The Karkheh is connected with the SAR through a system of marshes, while the Karun discharges into the  
21 SAR at approximately 87 km from the mouth.  
22

23 The estuary experiences a tidal cycle of approximately 12 hours 25 minutes with notable flood and ebb tides (Fig. 2). The estuary has a  
24 mixed-diurnal and semi-diurnal tide with successive spring and neap tide. The tidal range (the difference between the water levels at high  
25 water (HW) and low water (LW)) varies from 1 m (neap) to 3 m (spring). Salinity levels fluctuate at an hourly scale depending on the tide  
26 cycles and fresh water discharge. Salinity increases during flood tides and decreases during ebb. The impact of fresh water inflows can be  
27 clearly recognized during neap tide and ebb periods. The salinity level also varies along the year, for example the highest value measured in  
28 the year 2014 was  $40 \text{ kg/m}^3$  during summer and the lowest value was  $0.7 \text{ kg/m}^3$ .  
29  
30  
31

32 The SAR is the main surface water source for daily consumption and agricultural uses in the region and serves around 3 million people, the  
33 majority living in Basra city. Rural communities live along the river and around the marshes and derive their livelihoods mainly from  
34 agriculture and livestock. The main agricultural lands extend along the river banks with large date palm plantations. A variety of human



1 activities along the SAR and its tributaries deteriorates the water quality and has significantly increased the salinity concentration over  
2 time. In addition, the decreases of freshwater inflows into the estuary due to upstream water withdrawals have allowed the seawater to  
3 intrude further upstream. Currently the Tigris is the main source of fresh water for the SAR, its discharge ranges between 30- 100 m<sup>3</sup>/s. The  
4 total discharge from other tributaries, except the Karun, ranges between 0- 10 m<sup>3</sup>/s. The available information on discharge of the Karun is  
5 limited and inconclusive. Most relevant is Ahvaz station in Iran (UN-ESCWA and BGR, 2013; Salarijazi et al., 2012; Afkhami et al.,  
6 2007), the most downstream gauging station but still located approximately 200 km upstream of the confluence with the SAR. Due to large  
7 scale water developments, the mean annual discharge of the Karun has experienced a consistent negative trend from 815 m<sup>3</sup>/s to 615 m<sup>3</sup>/s  
8 before and after 1963, respectively (UN-ESCWA and BGR, 2013). Whereas Salarijazi et al. (2012) reported a mean annual river discharge  
9 at Ahvaz of 1,442 m<sup>3</sup>/s for the period 1954-2005, the mean monthly river discharge for the period between 1978 and 2009 was only 667  
10 m<sup>3</sup>/s (personal communication Dr. Meysam Salarijazi). However, the Karun river discharge into the SAR is believed to have decreased  
11 even more in recent years due to continued increases in water abstractions upstream. The combination of tide and fluctuating river  
12 discharge makes it difficult to recognize the real extent of salt intrusion and its impact on the horizontal salinity pattern along the river  
13 under different conditions.

14 Adding to the complexity of studying salt intrusion in the Shatt al-Arab, is that it is the border river between Iraq and Iran, with strict  
15 security conditions. This does not make it easy to organize hydrometric surveys by speedboat and carry out salinity observations during an  
16 entire tidal cycle. As a result, the field data collected during this study and the results obtained by the analytical model form a unique data  
17 set for the region.  
18  
19  
20

### 21 3 Theory of the analytical model

22  
23 During a tidal cycle, the tidal velocity is near zero just before the tidal current changes direction. This situation is known as high water  
24 slack (HWS) just before the direction changes seaward, and low water slack (LWS) just before the direction changes landward. The model  
25 originally proposed by Savenije (1989), calibrated with measurements made at HWS, describes the salinity distribution in convergent  
26 estuaries as a function of the tide, river flow and geometry, using the Van der Burgh's coefficient ( $K$ ) and the dispersion coefficient ( $D_0$ ) at  
27 the mouth. A conceptual sketch of the 1-D model of salt intrusion is shown in Fig.3.  
28  
29  
30

31 The geometry of an estuary can be presented by exponential functions describing the convergence of the cross-sectional area and width  
32 along the estuary as:  
33

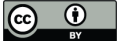

$$1 \quad A = A_o \exp \frac{x}{a_1}, \quad \text{for } 0 < x \leq x_I \quad (1)$$

$$2 \quad A = A_I \exp \frac{(x-x_I)}{a_2}, \quad \text{for } x > x_I \quad (2)$$

$$3 \quad B = B_o \exp \frac{x}{b_1}, \quad \text{for } 0 < x \leq x_I \quad (3)$$

$$4 \quad B = B_I \exp \frac{(x-x_I)}{b_2}, \quad \text{for } x > x_I \quad (4)$$

5  
 6 where  $A_o$  and  $B_o$  are the cross-sectional area [ $L^2$ ] and width [ $L$ ] at the estuary mouth ( $x=0$ ),  $A_I$  and  $B_I$  are the cross-sectional area and width  
 7 at the inflection point ( $x=x_I$ ), and  $a_{1,2}$  and  $b_{1,2}$  are the cross-sectional and width convergence lengths [ $L$ ] at  $x \leq x_I$  and  $x > x_I$ , respectively.

8  
 9 Combining (1) with (2) and (3) with (4) describes the longitudinal variation of the depth:

$$11 \quad h = h_o \exp \frac{x(a_1-b_1)}{a_1 b_1}, \quad \text{for } 0 < x \leq x_I \quad (5)$$

$$12 \quad h = h_I \exp \frac{(x-x_I)(a_2-b_2)}{a_2 b_2}, \quad \text{for } x > x_I \quad (6)$$

13  
 14 where  $h$ ,  $h_o$  and  $h_I$  are the cross-sectional average water depths [ $L$ ] at distance  $x$  from the mouth, at the estuary mouth, and at the inflection  
 15 point respectively.

16  
 17 Integrating the geometry equations into the salt balance equation of Van der Burgh (1972) yields a steady state longitudinal salinity  
 18 distribution along the estuary (see Savenije 2005) under HWS condition:

$$20 \quad S - S_f = S_o - S_f \left(\frac{D}{D_o}\right)^{\frac{1}{K}}, \quad \text{for } 0 < x \leq x_I \quad (7)$$

$$21 \quad S - S_f = S_I - S_f \left(\frac{D}{D_I}\right)^{\frac{1}{K}}, \quad \text{for } x > x_I \quad (8)$$

22  
 23 where  $D_o$ ,  $D$ , and  $D_I$  [ $L^2 T^{-1}$ ] are the dispersion coefficient at the estuary mouth, at any distance  $x$ , and at the inflection point,  $S_o$ ,  $S_I$  and  $S$   
 24 [ $ML^{-3}$ ] are the salinity at the estuary mouth, inflection point, and distance  $x$  respectively,  $S_f$  is the fresh water salinity, and  $K$  is the Van der  
 25 Burgh coefficient which according to Savenije (2005) has a value between 0 and 1; where

$$27 \quad \frac{D}{D_o} = 1 - \beta_o \left( \exp \left( \frac{x}{a_1} \right) - 1 \right), \quad \text{for } 0 < x \leq x_I \quad (9)$$

28  
 29 and

30

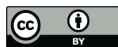

$$\frac{D}{D_1} = 1 - \beta_1 \left( \exp\left(\frac{x-x_1}{a_2}\right) - 1 \right), \quad \text{for } x > x_I \quad (10)$$

with

$$\beta_0 = \frac{K a_1 Q_f}{D_0 A_0}, \quad \text{for } 0 < x \leq x_I \quad (11)$$

$$\beta_1 = \frac{K a_2 Q_f}{D_1 A_1}, \quad \text{for } x > x_I \quad (12)$$

$\beta_0$  and  $\beta_1$  are the dispersion reduction rate [-] at the estuary mouth and at the inflection point, respectively, and  $Q_f$  is the freshwater discharge.

The salt intrusion model is used to estimate the salt intrusion length, which can be determined using low water slack (LWS, the lower extreme salt intrusion), high water slack (HWS, the upper salt intrusion), or tidal average (TA, the average of full tidal cycle). Savenije (2012) proposed to calibrate the model on measurements carried out at HWS. This is to obtain the maximum salt intrusion over the tidal cycle. The salinity distribution can be computed at LWS and TA based on the relation between salinity distributions during the three conditions. The salt distribution curve at HWS could be shifted downstream over a horizontal distance equal to the tidal excursion length ( $E$ ) and half of the tidal excursion length ( $E/2$ ) to obtain the salt distribution curve at LWS and TA conditions respectively. The model variables can be determined from field observations and shape analysis; while the two parameters  $K$  and  $D_0$  remain unknown, in addition to  $Q_f$ , which is difficult to determine in the tidal region. To facilitate the calibration process,  $D_0$  and  $Q_f$  are combined in one variable, the mixing coefficient  $\alpha_0 [L^{-1}]$ :

$$\alpha_0 = \frac{D_0}{Q_f} \quad (13)$$

After model calibration, the values for  $K$  and  $\alpha_0$  are known and the salinity at any point along the estuary can be calculated. Finally the salt intrusion length ( $L$ ) during HWS is obtained by:

$$L^{HWS} = x_1 + a_2 \ln\left(\frac{1}{\beta_1} + 1\right), \quad (14)$$

The calibration parameters can be obtained based on field measurements, but to turn the model into a predictive model, a separate equation for  $D_0$  is required. A predictive equation for  $D_0$  was presented by Savenije (1993), and then improved by Gisen et al. (2015b), who moved the boundary condition to a more identifiable inflection point  $x_1$ , based on observations made for a large number of estuaries worldwide as:

$$D_1 = 0.1167 E_1 v_1 N_R^{0.57}, \quad (15)$$



1  
2 with

$$3 \quad N_R = \frac{\Delta\rho gh Q_f T}{\rho A E \nu^2}, \quad (16)$$

5  
6 and

$$7 \quad E = \frac{\nu T}{\pi}, \quad (17)$$

9  
10  $N_R$  is the estuarine Richardson number [-], the ratio of potential energy of the buoyant freshwater to the kinetic energy of the tide,  $\rho$  and  $\Delta\rho$   
11 [ML<sup>-3</sup>] are the water density and the density difference over the intrusion length,  $g$  is the gravitational acceleration [LT<sup>-2</sup>],  $T$  is the  
12 tidal period [T],  $\nu$  is the velocity amplitude [LT<sup>-1</sup>], and  $E$  is the tidal excursion [L].

13  
14 This study tests the predictive performance of the 1-D analytical salt intrusion model, combined with new revised predictive equations to  
15 analyze the real extent of seawater intrusion in the SAR estuary under different river discharge conditions.

#### 16 4 Data collection

17  
18 The 1-D analytical salt intrusion model is based on a number of parameters that can be obtained through field surveys. Variables such as  $K$   
19 and  $D_0$  are not directly measurable and therefore they are obtained by calibrating the simulated salinity curve to the datasets from the salt  
20 intrusion measurements. For this study four measurement campaigns were conducted, mainly measuring salt concentrations and water  
21 levels. The measurements took place during the wet and dry periods at spring and neap tides. These were on 26 March 2014 (neap-wet), 16  
22 May 2014 (spring-dry), 24 September 2014 (spring-dry), and 5 January 2015 (spring-wet).

23  
24 Salinity measurements were conducted at the moment just before the flow changes direction (HWS and LWS). The HWS and LWS  
25 represent the envelope of the vertical salinity variation during tidal cycles, and are also used to determine the longitudinal tidal excursion.  
26 A moving boat technique was used in the field survey in which the boat moved with the speed of the tidal wave to capture the slack  
27 moment. Starting from the mouth of the estuary and in the middle of the course, the salinity variations during the tidal cycle were observed.  
28 A conductivity meter, YSI EC300A (<https://www.ysi.com>) with a cable length of 10 m, was used to measure the vertical salinity profile for  
29 each meter depth from the bottom to the surface, and it was done repetitively at an interval of 3-4 km (longitudinally) until the river salinity  
30 was reached (in this case 1.5 kg/m<sup>3</sup>).  
31



1 The required information on river discharge and cross-sectional profile were provided by the local water authority. It is difficult to measure  
2 the discharge accurately in an estuary considering the tidal fluctuation. Hence, the discharge data from the nearest (most downstream)  
3 station was used in the analysis. The daily stream flow data of all the tributaries within the country were obtained from the Department of  
4 Water Resources in Iraq. However, there were no data on the discharge of one tributary, the Karun River, being located in neighboring  
5 Iran. Experts of the water resources authority in Basra indicated that average discharge of the Karun River was estimated at  $40 \text{ m}^3/\text{s}$ . River  
6 cross sections data were collected based on the last survey carried out in 2012 by GDSD (General Directorate of Study and Design).  
7

## 8 **5 Salinity modelling**

### 9 **5.1 Geometric characteristics**

10 Results of the cross-sectional area, width, and depth are presented in a semi-logarithmic scale plot in Fig. 4. This Figure shows a good  
11 agreement between the computed cross-sectional areas  $A$ , width  $B$ , and depth  $h$  based on Eqs. (1)-(6) and the observed data, except for the  
12 part between 40 and 50 km, which is shallower in comparison to the rest of the estuary. The cross-sectional area  $A$  and width  $B$  are divided  
13 into two reaches with the convergence length  $a_1$  and  $a_2$  of 22 km and 26 km respectively (see Table 1). The geometry changes in  
14 decreasing pattern landwards following an exponential function. In an alluvial estuary, the wide mouth and shorter convergence length on  
15 the seaward part is generally wave dominated, while the landward part with longer convergence length is tide dominated. The average  
16 depth  $h$  is almost constant with a very slight decrease along the estuary axis (a depth convergence length of 525 km).  
17  
18

### 19 **5.2 Vertical salinity profile**

20  
21 In Fig. 5 the results of the observed vertical salinities profile at HWS are presented. It can be seen that the salt intrusion mechanism is well  
22 mixed for the entire observation period. During the wet period when river discharge is relatively high, partially mixed condition can be  
23 observed particularly at the downstream area (Fig. 5a and 5d). In the neap-wet condition as shown in Figure 5a, there is more stratification  
24 and the partially mixed pattern occurs in almost the entire stretch of the estuary. This is because at neap tide, the tidal flows are small  
25 compared to the high fresh water discharge during the wet season. Conversely, during the spring-dry period when the river discharge is  
26 significantly low and the tidal range is large (Fig. 5b and 5c), the vertical salinity distribution along the estuary is well mixed.  
27  
28

### 29 **5.3 Longitudinal salinity profile**

30  
31 The measurements of salinity during HWS and LWS are presented in Fig. 6. Calculations of the longitudinal salinity profiles are based on  
32 Eqs. (7)-(14), where the dispersion  $D$  decreases over  $x$  until it reaches zero at the end of the salt intrusion length. Coefficients  $K$ ,  $D_0$ , and  $E$





1 were calibrated to obtain the best fit between measured salinity data and simulated salinity variations. The longitudinal salinity distributions  
2 during a tidal cycle are demonstrated by three curves: (1) the maximum salinity curve at HWS; (2) the minimum salinity curve at LWS; (3)  
3 the average of HWS and LWS represent the average salinity curve at TA. Tidal excursion ( $E$ ) is determined from the horizontal distance  
4 between the salinity curves of HWS and LWS. This distance is considered constant along the estuary axis during the tidal cycle. In this  
5 study, the tidal excursion is found to be 14 km on 24 September and 10 km for the other observations (Table 2).  
6

7 The results show good agreement between measured and simulated salinity profiles with few deviations between the observed and modeled  
8 salinities. The small deviations may be due to the timing errors in which the boat movement speed did not coincide exactly with the tidal  
9 wave. In Fig. 6 (a and d), it can be seen that the measured salinity at distance 20 and 24 km during HWS are higher than the simulated  
10 values. There is a sub-district (with considerable agricultural communities) and a commercial harbor, and it is believed that all of their  
11 effluents and drainage water are discharged into the river. This could be the reason for the salinity to be a little higher than expected. In Fig.  
12 6c, the last measurement point is lower than the simulated one. This may be due to the relatively shallow stretch between 40 and 50 km,  
13 which can substantially reduce the salt intrusion. Also a timing error may be an explanation for this deviation: the boat did not move fast  
14 enough as it was delayed for short stops at police checkpoints.  
15

16 All the field surveys indicate that the maximum salinity at the mouth ranged from 24 to 35 kg/m<sup>3</sup> (Table 2). The lowest maximum salinity  
17 is during the neap-wet period and the highest is during the spring-dry period. It can be seen that the sea water intrudes furthest in  
18 September (spring-driest period) and shortest in March (neap-wet). These finding are logical because during wet season, the estuary is in a  
19 discharge dominated condition and the lower tide (neap) can be easily pushed back by the river discharge. On the other hand, during the  
20 dry season the estuary is tide dominated and the higher tide (spring) managed to travel further inland without much obstruction (low fresh  
21 water discharge). The tidal ranges recorded during field surveys are 1.7, 3.2, 2.1, and 2.6, respectively as same date shown in Fig. 6(a)-(d).  
22

23 Besides sea water intrusion, human activities at the upstream part of the estuary also contribute to the salinity levels along the river. From  
24 observations, the river salinity at the inland part varies in space and time between 1-2 kg/m<sup>3</sup>. Thus, the salt concentrations are the result of a  
25 combination of anthropogenic and marine sources (Abdullah et al., submitted). The findings from the longitudinal salinity distribution  
26 indicate that there is a need to analyze and classify the effects of natural and anthropogenic factors on estuary salinity.  
27  
28

#### 29 5.4 The predictive model

30  
31 The dispersion coefficient  $D$  is not a physical parameter that can be measured directly. It represents the mixing of saline and fresh water,  
32 and can be defined as the spreading of a solute along an estuary induced by density gradient and tidal movement. Knowing the river  
33 discharge is crucial for determining a dispersion coefficient  $D$  from Eq. (9). However, it is difficult to measure the river discharge  
34 accurately in the tidal region due to the tidal fluctuation. In this study, the river discharge data on the days of the measurements were used  
35 from the gauging station located at the most downstream part of the river network.



1  
 2 For the situation where measured salinity are known the dispersion coefficient  $D_0$  and the salt intrusion length  $L$  at HWS were calibrated by  
 3 fitting the simulated salinity curve (Eq. 7-14) against the field data. In case no field data are available, the dispersion coefficient  $D_1$  was  
 4 estimated using Eq. 15. The predicted  $D_1$  then was used to determine the predicted  $D_0$  (using Eq.9) and  $L$  (using Eq.14). Comparisons  
 5 between the calibrated and predicted values were done to evaluate the performance of the model. The prediction performance was  
 6 evaluated with two model accuracy statistic: The root mean squared error ( $E_{RMS}$ ) and Nash-Sutcliffe Efficiency ( $E_{NS}$ ) (Equation 18 and 19,  
 7 respectively).

$$9 \quad E_{RMS} = \sqrt{\frac{1}{n} \sum_{i=1}^n (P_i - O_i)^2} \quad (18)$$

$$10 \quad E_{NS} = 1 - \frac{\sum_{i=1}^N (O_i - P_i)^2}{\sum_{i=1}^N (O_i - \bar{O})^2} \quad (19)$$

11  
 12 where  $P$  and  $O$  are the predictive and observed variables, respectively, and  $\bar{O}$  is the observed mean. The index ( $E_{NS}$ ) ranges from  $-\infty$  to 1. It  
 13 describes the degree of accurate prediction. The efficiency of one indicates complete agreement between predicted and observed variables,  
 14 whereas efficiency less than zero indicate that the prediction variance is larger than the data variance.

15  
 16 Figure 7 presents poor correlations between the calibrated and predicted values of  $D$ , the situation is better in case of  $L$  values. Table 4  
 17 displays the correlation between predicted and measured values. The  $E_{NS}$  obtained for  $D$  is -0.09 reflects weak predictive performance.  
 18 Generally the model appears to overestimate the values of the dispersion coefficient compared to the calibrated ones during the wet period  
 19 and to underestimate the value during the drought period in September. This could be due to the use of the measured discharge at the end of  
 20 the tidal domain, which gives higher or lower values than the exact fresh water discharging into the estuary, as it does not account for the  
 21 discharge of the Karun River at the downstream end and the water consumptions and water losses within the system (see Table 3). The  
 22 SAR is the main freshwater source for irrigation, domestic and industrial activities in the region. Hence, water consumptions could highly  
 23 affect the performance of a predictive model especially in the region where water withdrawals can considerably reduce river discharge into  
 24 the estuary.

25  
 26  
 27  
 28 In order to reduce the uncertainty in the discharge data, some alternative approach has to be adopted. Gisen et al. (2015a) estimated the  
 29 discharges for the downstream areas by extrapolating the correlation of the gauged area to the ungauged areas. Cai et al. (2014) developed  
 30 an analytical approach to predict the river discharge into an estuary based on tidal water level observations. This method is only applicable  
 31 in estuaries with a considerable river discharge compared to the tidal flows. In this study, a simple approach has been used to assess the  
 32 discharge in the SAR estuary by deducting the water withdrawals in the downstream region from the discharge data collected at the lowest  
 33 gauging points. In a similar way also the average discharge of the Karun was estimated (Table 3). Data on water withdrawals were  
 34 collected from the water resources authority and water distribution departments. Besides irrigation and domestic supply, the industrial



1 sector, including the oil industry, is also a significant water user. Unfortunately this study could not obtain information on water usage and  
2 disposal by the oil industry.

3  
4 The adjusted river discharge data are then applied in the predictive model to evaluate the improvement of these changes in predicting  
5 values of  $D$  and  $L$ . The results obtained after the adjustment are shown in Fig. 8. The figures demonstrate the improvements in predicting  
6 the dispersion and maximum salt intrusion length and show the importance of computing the fresh water discharge accurately. Furthermore  
7 the correlations between predictive and observed values are improved for both  $D_0$  and  $L$ , 0.46 and 0.9 respectively, the  $E_{RMS}$  also reduced  
8 to  $60 \text{ m}^2/\text{s}$  and 4 km for  $D_0$  and  $L$ , respectively (Table 4).

9  
10  
11  
12 The prediction performance of the model is demonstrated in Fig. 9, where the salinity curves were computed from the predictive equation  
13 of  $D_1$  and the adjusted river discharges. Figure 9 shows that the prediction salinity curves perform very well compared to the calibrated one  
14 during all periods, except January 2015. This could be attributed by the average discharge used for the Karun River, in which the value is  
15 lower than the actual discharge, being the month of January, is in the mid of the wet season. At such time the SAR is expected to receive  
16 high flow rates from the Karun River. On the other hand, during this season more return flows are drained into the SAR from the large  
17 irrigation scheme serviced by the Karun water system, increasing anthropogenic salinity levels. Accurate estimation of river discharge into  
18 the estuary is important in improving the predictive skill of the model.

19  
20  
21  
22 The ultimate objective of the modeling is to assess the influence of upstream development on the estuarine environment, and also to find  
23 the real extent of salt intrusion. The salinity distribution along the estuary is highly linked to upstream conditions, such as flow regulation  
24 and water withdrawals. For the purpose of improving the SAR estuary management, the model can lead to estimate a salt intrusion length  
25 for a given fresh water discharge. This is useful for water supply managers to determine the appropriate location (salinity free region) for  
26 water intake stations. Fig. 10 demonstrates the salt intrusion length ( $L$ ) associated with different river discharges corresponding to water  
27 released from the Tigris River into the SAR. The salt intrusion lengths are plotted against a range of fresh water discharge from 5 to 120  
28  $\text{m}^3/\text{s}$ . The main finding is that the length of salt intrusion increases in a non-linear way with decreasing river discharge. The salt intrusion  
29 length is very sensitive for river discharge when the flow is low. From the plot it can also be seen that the maximum salt intrusion could  
30 reach 92 km from the SAR estuary at  $5 \text{ m}^3/\text{s}$  river discharge. This outcome exceeds a preliminary estimate by Abdullah et al. (submitted)  
31 based on a one-year data series, who found the salinity to reach up to 80 km considering the annual salinity peaks along the river. An 80 km  
32 intrusion length corresponds with a measured river discharge of  $58 \text{ m}^3/\text{s}$ , whereas for the predictive model this distance corresponds to a  
33 much lower discharge ( $7 \text{ m}^3/\text{s}$ ). It is, however likely that the true river discharge was lower, since during the lowest discharge the irrigation  
34 demand is relatively high. It should also be realized that in the region of 40-50 km the depth and cross-sectional area are substantially less.  
35 Such a shallow reach can reduce the salt intrusion length substantially, as can be seen from Eq. (14), where  $\beta_l$  is inversely proportional to  
36  $A$ .



1  
2

### 3 **6 Conclusion**

4 A one-dimensional analytical salt intrusion model was applied to the SAR estuary based on four survey campaigns in 2014 and 2015. This  
5 model is used to determine longitudinal salinity distribution and the length of salt intrusion. The analytical model is shown to describe well  
6 the exponential shape of the estuary in the upstream direction. Moreover, the results show good agreement between computed and observed  
7 salinity under different river conditions. This indicates that the analytical model is capable of describing the extent of seawater intrusion  
8 along the SAR estuary.

9  
10 Results for the dispersion coefficient  $D_o$  indicate that the measured river discharge out of the tidal range is higher than the real discharge  
11 into the estuary. This can be attributed to water withdrawals along the tidal domain. In case of low river discharge, water withdrawals have  
12 a considerable effect on the predicted salt intrusion length. The river discharge into the estuary was revised considering water withdrawals  
13 of irrigation and domestic sectors. Using adjusted river discharge improved performance of the predictive equations. For further  
14 improvement, it is recommended to obtain more accurate estimation of the river discharge into the estuary.

15  
16 Seawater intrusion is driven by the discharge kinetics from tidal seawater and the hydrostatic potential energy from fresh water  
17 fluctuations. Intrusion lengths of 38, 40, 65, and 43 km correspond with tidal ranges of 1.7, 3.2, 2.1, and 2.6 m during March 2014, May  
18 2014, September 2014, and January 2015, respectively. The longer salt intrusion distance is caused by low river discharge, as evident for  
19 September (dry period).

20  
21 The SAR is the main source of freshwater for daily consumption and irrigation. Decreased freshwater discharge and increased seawater  
22 intrusion will exacerbate an already critical situation in that important agricultural and ecological region. The model shows a scenario in  
23 which decreasing river discharge, considered a likely event, can result in an increase in seawater intrusion further upstream to a distance of  
24 92 km. Additional salinity sources from anthropogenic activities will diminish the volume of fresh water leading to very serious health  
25 problems, water and food insecurity. Calibration of the model can be enhanced with further monitoring of discharge and salinity from all  
26 the tributaries and used to make new estimates of longitudinal salinity distribution under extreme conditions. Preventing salt intrusion of  
27 these magnitudes can only be achieved if the water quantity and quality of the upstream sources as well as along the SAR are promptly and  
28 strictly regulated

### 32 **References**

33



- 1 Abdullah, D.A., Masih, I., Van der Zaag, P., Karim, U.F.A., Popescu, I., and Al Suhail, Q.: The Shatt al-Arab System under Escalating  
2 Pressure: a preliminary exploration of the issues and options for mitigation, *International Journal of River Basin Management*, 13 (2),  
3 215–227, 2015.
- 4 Abdullah, A.D., Karim, U.F.A., Masih, I., Popescu, I., and van der Zaag, P.: Anthropogenic and tidal influences on salinity levels and  
5 variability of the Shatt al-Arab River, Submitted to *International Journal of River Basin Management*.
- 6 Afkhami, M., Shariat, M., Jaafarzadeh, N., Ghadiri, H., and Nabizadeh, R.: Development a Water Quality Management Model for Karun  
7 and Dez Rivers. *Iran, J. Environ. Health. Sci. Eng.*, 4(2), 99-106, 2007.
- 8 Alber, M.: A Conceptual Model of Estuarine Freshwater Inflow Management, *Estuaries*, 25(6B),1246-1261, 2002.
- 9 Al-Tawash, B., Al-Lafta, S. H., and Merkel, B.: Preliminary Assessment of the Shatt al Arab Riverine Environment, Basra Government,  
10 Southern Iraq, *Journal of Natural Science Research*, 3(13), 120-136, 2013.
- 11 Becker, M.L., Luetlich, R.A., and Mallin, M.A.: Hydrodynamic Behaviour of the Cape Fear River and Estuarine: A Synthesis and  
12 Observational Investigation of Discharge -Salinity Intrusion Relationships, *Estuarine, Coastal and Shelf Science*, 88, 407-418, 2010.
- 13 Bobba, A. G.: Numerical Modelling of Salt-water Intrusion due to Human Activities and Sea-level Change in the Godavari Delta, India,  
14 *Hydrological Science, Special Issue: Towards integrated Water Resources Management for sustainable Development*, 47, S67-S80,  
15 2002.
- 16 Cai, H., Savenije, H.H. G., and Gisen, J. I. A.: A coupled analytical model for salt intrusion and tides in convergent estuaries, *Hydrological  
17 Sciences Journal*, doi:10.1080/02626667.2015.1027206, 2015.
- 18 Cai, H., Savenije, H.H.G., Jiang, C.: Analytical approach for predicting fresh water discharge in an estuary based on tidal water level  
19 observation, *Hydrology Earth System Science*, 18:4153-4168.<http://dx.doi.org/10.5194/hess-18-4153-2014>, 2014.
- 20 Cai, H., Savenije, H. H. G., Yang, Q., Ou, S., and Lei, Y.: Influence of River Discharge and Dredging on Tidal Wave Propagation:  
21 Modaoen Estuary Case, *Journal of Hydraulic Engineering* , 138, 885-896, 2012.
- 22 Das, A., Justic, D., Inoue, M., Hoda, A., Huang, H., and Park, D.: Impacts of Mississippi River Diversions on Salinity Gradients in a  
23 Deltaic Louisiana Estuary: Ecological and Management Implications, *Estuarine, Coastal and Shelf Science*, 111, 17-26, 2012.
- 24 Fawzi, M.N. and Mahdi, A. B.: Iraq's Inland Water Quality and Their Impact on the North-Western Arabian Gulf, *Marsh Bulletin*, 9(1), 1-  
25 22, 2014.
- 26 Gisen, J.I.A. Savenija, H.H.G., Nijzink, R.C., and Wahab, A.K. Abd.: Testing a 1-D analytical salt intrusion model and its predictive  
27 equations in Malaysian estuaries, *Hydrological Sciences Journal*, 60(1),156-172, 2015a.
- 28 Gisen, J. I. A., Savenije, H. H. G., and Nijzink, R. C.: Revised predictive equations for salt intrusion modelling in estuaries, *Hydrol. Earth  
29 Syst. Sci. Discuss.*, 12,739-770, 2015b.
- 30 Helland-Hansen, E., Holtedahl, T. and Liye, K. A.: *Environmental Effects. Vol. 3. Hydropower Development*, Norwegian Institute of  
31 Technology, Trondheim, 1995.
- 32 Horrevoets, A. C., Savenije, H.H.G., Schuurman, J. N., and Graas, S.: The Influence of River Discharge on Tidal Damping in Alluvial  
33 Estuaries, *Journal of Hydrology*, 294, 213–228, 2004.
- 34 Ippen, A.T. and Harlemen, D.R.F.: *One-Dimensional Analysis of Salinity Intrusion in Estuaries*, Technical bulletin no.5, Committee on  
35 Tidal Hydraulics, Corps of Engineers, U.S. Army, 1961.



- 1 Liu, W., Hsu, M., Wu, C., Wang, C., and Kuo, A.Y.: Modeling Salt Water Intrusion in Tanshui River Estuarine System-Case-Study  
2 Contrasting Now and then, *Journal of Hydraulic Engineering*, 130 (9), 849-859, 2004.
- 3 MacKay, H.M. and Schumann, E.H.: Mixing and circulation in the Sundays river estuary, South Africa, *Estuarine, Coastal and Shelf  
4 Science*, 31(2), 203-216, 1990.
- 5 Nguyen, A.D. and Savenije, H.H.G.: Salt Intrusion in Multi-Channel Estuaries: A Case Study in the Mekong Delta, Vietnam, *Hydrology  
6 and Earth System Sciences*, 10,743-754, 2006.
- 7 Prandle, D.: On Salinity Regimes and the Vertical Structure of Residual Flows in Narrow Estuaries, *Estuarine, Coastal and Shelf Science*,  
8 20, 615-635, 1985.
- 9 Risley, J.C., Guertin, D.P., and Fogel, M.M.: Salinity Intrusion Forecasting System for Gambia River Estuary, *Journal of Water Resources  
10 Planning and Management*, 119, 339-352, 1993.
- 11 Salarjazi, M., Akhond-Ali, A-M., Adib, A. and Daneshkhal, A.: Trend and change-point detection for the annual stream-flow series of the  
12 Karun River at the Ahvaz hydrometric station, *African Journal of Agricultural Research*, 7(32), 4540-4552, 2012.
- 13 Savenije, H.H.G.: One-Dimensional Model for Salinity Intrusion in Alluvial Estuaries, *Journal of Hydrology*, 85, 87-109, 1986.
- 14 Savenije, H.H.G.: Salinity Intrusion Model for High-Water Slack, Low Water-Slack, and Mean Tide on Spread Sheet, *Journal of  
15 Hydrology*, 107, 9-18, 1989
- 16 Savenije H.H.G.: Predictive Model for Salt Intrusion in Estuaries, *Journal of Hydrology*, 148(1-4),203-218, 1993.
- 17 Savenije, H.H.G.: Salinity and tides in alluvial estuaries, Amsterdam: Elsevier, 2005.
- 18 Savenije, H.H.G.: Salinity and tides in alluvial estuaries [online], Completely revised 2nd edition, Delft University of Technology,  
19 Available from: <http://salinityandtides.com> [Accessed 20 Jan 2015], 2012.
- 20 Savenije, H., Cai, H., and Gisen, J.: Developing a coupled analytical model for analyzing salt intrusion in alluvial estuaries, AGU Fall  
21 Meeting Abstracts 1,P,1664, 2013.
- 22 Sklar, F. H. and Browder, J. A.: Coastal Environment Impacts Brought about by Alteration to Freshwater Flow in the Gulf of Mexico,  
23 *Environmental Management*, 22(4), 547-562, 1998.
- 24 UN-ESCWA and BGR (United Nations Economic and Social Commission for Western Asia; Bundesanstalt für Geowissenschaften und  
25 Rohstoffe): Inventory of Shared Water Resources in Western Asia, Beirut, 2013.
- 26 Van der Burgh, P.: Ontwikkeling van een methode voor voorspellen van zoutverdelingen in estuaria, kanalen en zeeën, *Rijkswaterstaat  
27 Rapp*, 10-72, 1972.
- 28 Vaz, N., Dias, J.M., and Leitao, P.C.: Three-Dimensional Modelling of a Tidal Channel: The Espinheiro Channel (Portugal), *Continental  
29 Shelf Research*, 29, 29-41, 2009.
- 30 Vorosmarty and Sahagian, 2000. Anthropogenic Disturbance of the Terrestrial Water Cycle. *BioScience* 50 (9): 753-765.
- 31 Wang, Y., Liu Z., Gao, H., Ju, L., and Guo, X.: Response of Salinity Distribution around the Yellow River mouth to Abrupt Changes in  
32 River Discharge, *Continental Shelf Research* 31, 685-694, 2011.
- 33 Whitney, M.M.: A Study on River Discharge and Salinity Variability in the Middle Atlantic Bight and Long Island Sound, *Continental  
34 Shelf Research*, 30, 305-318, 2010.
- 35 Wong, K.C.: On the relationship between long-term salinity variations and river discharge in the middle reach of the Delaware estuary, *J.  
36 Geophys. Res.*, 100(C10), 20705-20713, doi:10.1029/95JC01406, 1995.



Zhang, E.F., Savenije, H.H.G., Chen, S.L., and Mao, X.H.: An analytical solution for tidal propagation in the Yangtze Estuary, China. *Hydrology and Earth System Sciences*, 16, 3327-3339, 2012.

**Table 1.** The geometry characteristic of the SAR estuary

| $A_0$ (m <sup>2</sup> ) | $A_1$ (m <sup>2</sup> ) | $B_0$ (m) | $B_1$ (m) | $a_1$ (m) | $a_2$ (m) | $b_1$ (m) | $b_2$ (m) | $\bar{h}$ (m) |
|-------------------------|-------------------------|-----------|-----------|-----------|-----------|-----------|-----------|---------------|
| 8,050                   | 4,260                   | 910       | 531       | 22,000    | 160,000   | 26,000    | 230,000   | 7.9           |

Notes:  $A_0$  and  $A_1$  are cross-sectional areas at the mouth and inflection point respectively.  $B_0$  and  $B_1$  are channel widths at the mouth and inflection point respectively, and  $a_1$ ,  $a_2$ , and  $b_1$ ,  $b_2$  are locations of the convergence length of the cross-sectional area and width respectively.  $\bar{h}$  is the average depth over the estuary length (of 60 km).

**Table 2.** Characteristic values of the estuary including the maximum salinity at the mouth  $S_o$ , the river discharge  $Q_f$ , Tidal excursion  $E$ , Van der Burgh coefficient  $K$ , the dispersion coefficient  $D_o$ , mixing number  $\alpha_o$ , and salt intrusion length  $L$ .

| Period            | $S_o$<br>(kg/m <sup>3</sup> ) | $Q_f$<br>(m <sup>3</sup> /s) | $E$<br>(km) | $K$  | $D_o$<br>(m <sup>2</sup> /s) | $\alpha_o$<br>(m <sup>-1</sup> ) | $L$<br>(km) |
|-------------------|-------------------------------|------------------------------|-------------|------|------------------------------|----------------------------------|-------------|
| 26 March 2014     | 24                            | 109                          | 10          | 0.65 | 403                          | 3.7                              | 32          |
| 16 May 2014       | 28                            | 91                           | 10          | 0.65 | 473                          | 5.2                              | 42          |
| 24 September 2014 | 34.6                          | 48                           | 15.5        | 0.65 | 442                          | 9.2                              | 65          |
| 05 January 2015   | 28                            | 53                           | 10          | 0.65 | 281                          | 5.3                              | 42          |

**Table 3.** Measured and adjusted river discharge considering water consumptions on the days of measurements.

| Date              | Measured river discharge<br>(not counting water abstractions<br>and excluding the Karun inflows) | Adjusted river discharge<br>(deducting water abstractions<br>and including the Karun inflows) |
|-------------------|--------------------------------------------------------------------------------------------------|-----------------------------------------------------------------------------------------------|
|                   | (m <sup>3</sup> /s)                                                                              | (m <sup>3</sup> /s)                                                                           |
| 26 March 2014     | 109                                                                                              | 114                                                                                           |
| 16 May 2014       | 91                                                                                               | 96                                                                                            |
| 24 September 2014 | 48                                                                                               | 58                                                                                            |
| 05 January 2015   | 53                                                                                               | 63                                                                                            |



1 **Table 4.** Results of the model performance in terms of root mean squared error ( $E_{RMS}$ ) and Nash-Sutcliffe efficiency ( $E_{NS}$ ).

| Date                     | NSE   | RMSE                 |
|--------------------------|-------|----------------------|
| Measured river discharge |       |                      |
| D <sub>0</sub>           | -0.09 | 76 m <sup>2</sup> /s |
| L                        | 0.75  | 6 km                 |
| Adjusted river discharge |       |                      |
| D <sub>0</sub>           | 0.46  | 60 m <sup>2</sup> /s |
| L                        | 0.9   | 4 km                 |

2  
 3  
 4

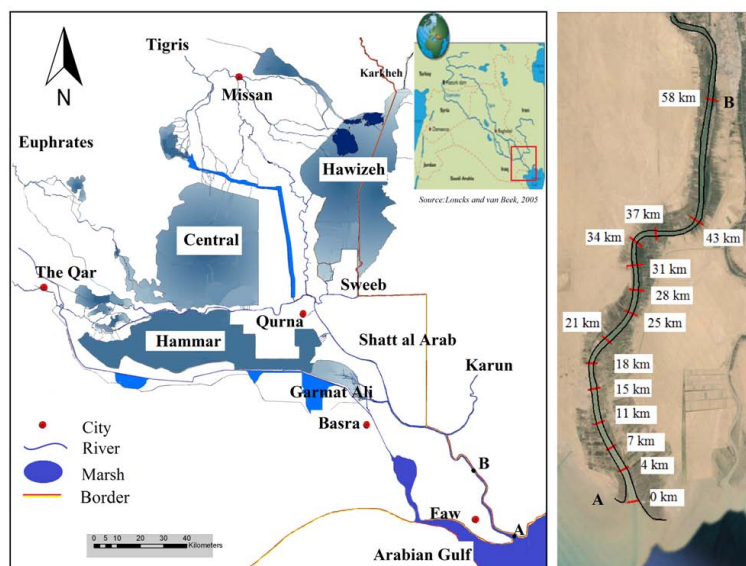

5  
 6  
 7  
 8  
 9

**Figure 1.** The Salient features of the Shatt al Arab region (left), the aerial view of the estuary from the Google earth with the measurement locations (not to scale) (right).





1

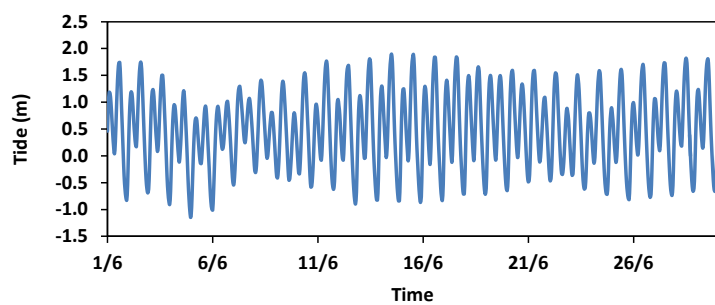

2

3

4

**Figure 2.** Tidal elevation at Faw station in June 2014.

5

6

7

8

9

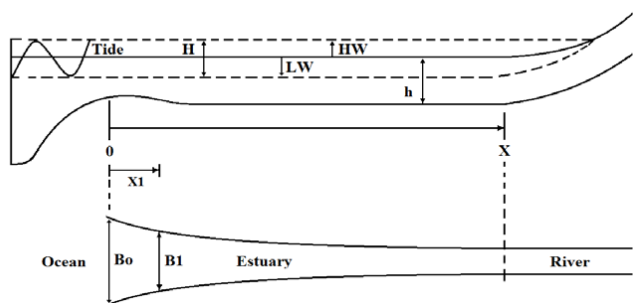

**Figure 3.** Sketch of the estuary the longitudinal profile and top view.

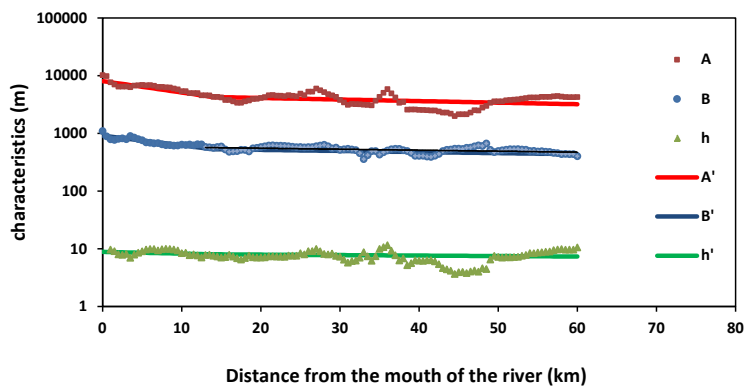

1  
2  
3  
4  
5

Figure 4. SAR geometric characteristics (A, B, h measured; A', B', h' equations 1-6).

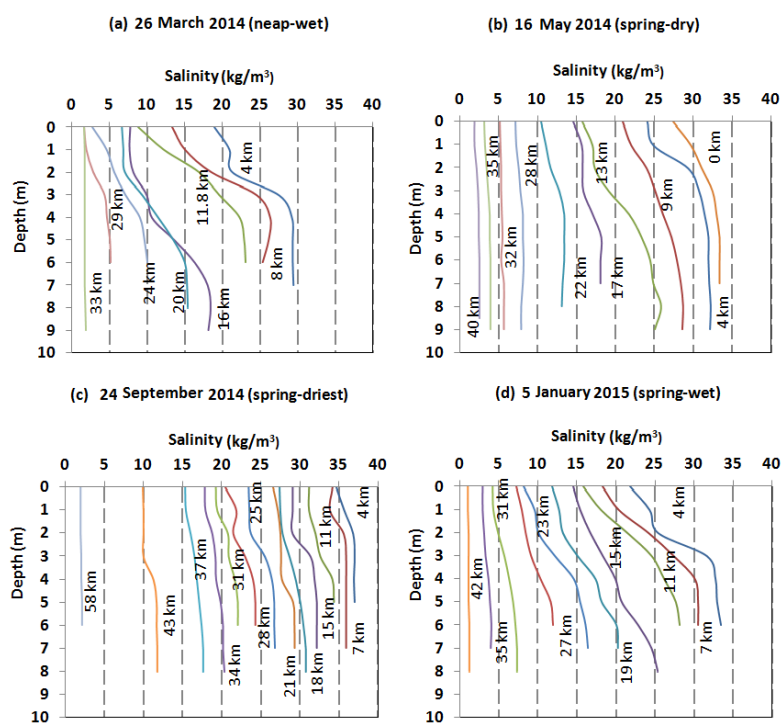

1  
2 **Figure 5.** Vertical salinity distribution of the estuary measured between 0 and 58 km at HWS.  
3

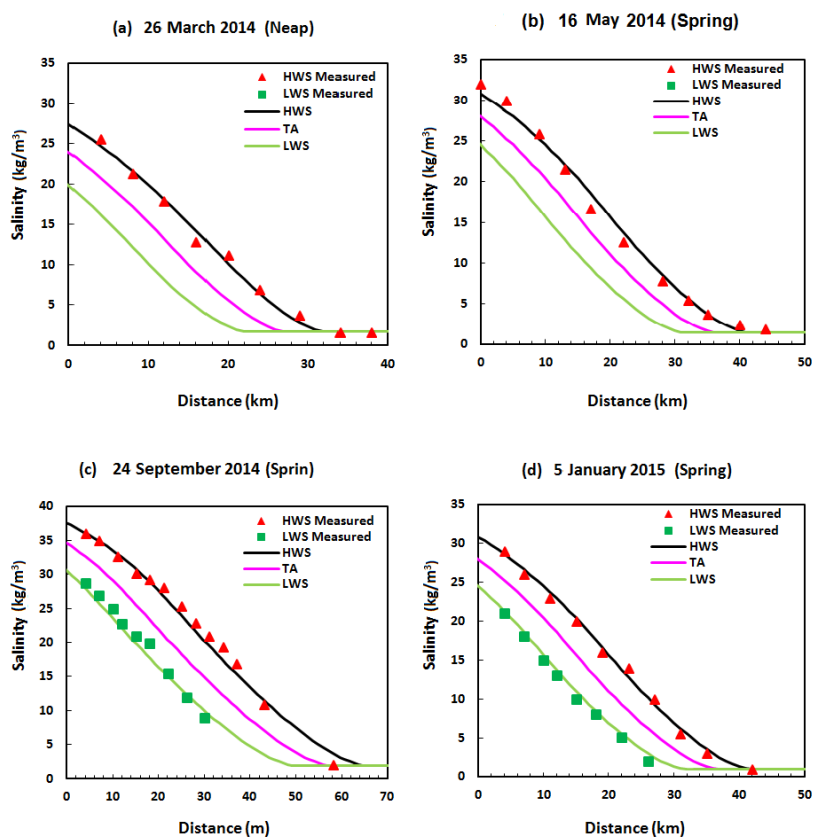

1  
2 **Figure 6.** Predicted and measured salinity distribution during HWS, TA, and LWS.  
3

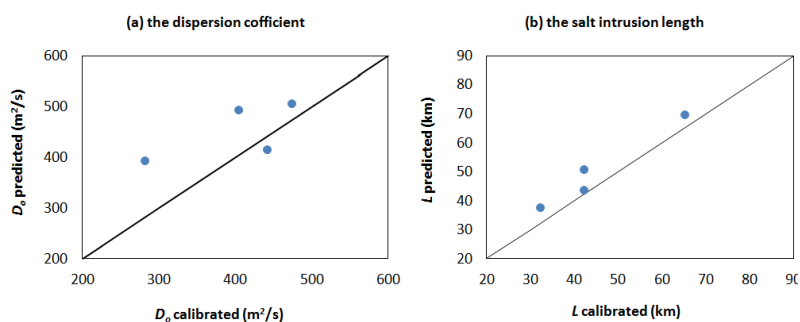

1  
2 **Figure 7.** Comparison between the predicted and calibrated values of  $D_0$  and  $L$ .  
3

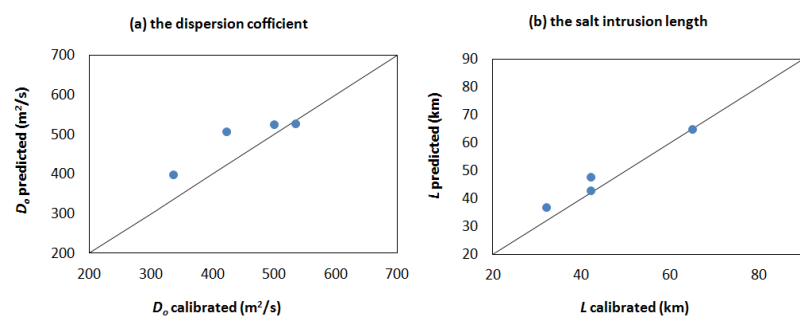

4 **Figure 8.** Comparison between the predicted and calibrated values of  $D_0$  and  $L$  using the improved discharge data.  
5  
6

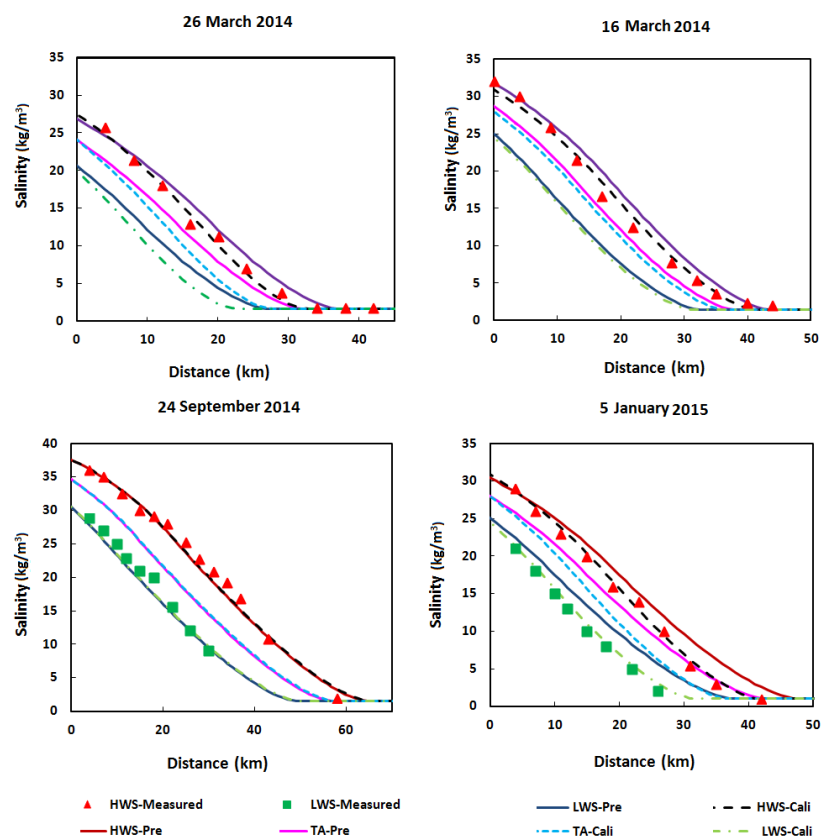

1  
 2 **Figure 9.** Compare the salinity curves of the calibrated results (dashed lines) and the predicted results (solid lines) to the observed salinity  
 3 during the four periods of the 2014.

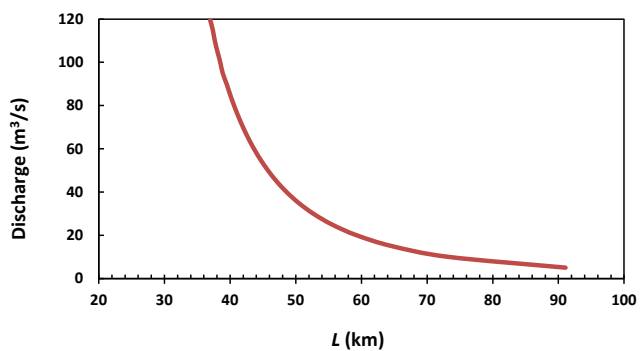

1  
2 **Figure 10.** Relationship between river discharge and predicted salt intrusion length.  
3
